# Supplementary material
Source: PubMed Central journal article supplement (PMC3957638)
Supplement: AEM.03829-13_zam999105207so1.pdf [file AEM.03829-13_zam999105207so1.pdf]

**Table S1. qPCR primers**

| <b>Name</b>  | <b>NCBI locus tag</b> | <b>Product size</b> | <b>Forward primer sequence 5'→3'</b> | <b>Reverse primer sequence 5'→3'</b> | <b>Reference</b> |
|--------------|-----------------------|---------------------|--------------------------------------|--------------------------------------|------------------|
| <i>cyoA</i>  | W5S_3266              | 175                 | GGACCTTGGTATCGCTACGGTTA              | GCCCGGTTTCATTAGCGATTAA               | This study       |
| <i>cyoC</i>  | W5S_3268              | 176                 | CTGGTGTTTATCGGGATGGAAA               | CCACGTTTGGACACCTGAATC                | This study       |
| <i>togM</i>  | W5S_2142              | 133                 | GCTGGCACTGATGTCGGTAA                 | CATTTGGATGCACCGTCG                   | This study       |
| <i>pgaA</i>  | W5S_4792              | 185                 | GAACGCATTGAAGGACAGCA                 | TTCGCCATTGATTCATCAAGC                | This study       |
| <i>togB</i>  | W5S_2139              | 79                  | GCAAAACTGGCGTTGGGTAA                 | GCATCTGTGCAGGTTTGAAGAA               | This study       |
| <i>phnG</i>  | W5S_0593              | 103                 | CTCCTGCAAACCCGATCCTA                 | CCACTTCCTGCTGTTGCTGTT                | This study       |
| <i>phnM</i>  | W5S_0599              | 163                 | CATCACGCTAGCCAGTCATGA                | GCCGCAGATGACATTTGGT                  | This study       |
| <i>moaE</i>  | W5S_2933              | 147                 | GGTTCGTAATCACAATCTGGCAA              | CCTACCCGATGAATCACACTCAC              | This study       |
| <i>rsmB</i>  | N/A                   | 92                  | GCCCCACCGACATTCCTAA                  | GCGCAGCTTTCAGGAAGAAA                 | This study       |
| <i>kdgR</i>  | W5S_2118              | 125                 | GTCTGCGCTAACGAGGGAAA                 | GCGGGTTACGACGACCAATA                 | This study       |
| <i>A0110</i> | W5S_0965              | 133                 | GATAGCGAGCCGATCAACCTTA               | CACGACCTGAATTGCCTTCA                 | This study       |
| <i>Pel 3</i> | W5S_4193              | 114                 | ATCTGCGGCCAGTGGAGTAA                 | CACGATCCAGACGCCAAA                   | This study       |
| <i>rsmA</i>  | W5S_1009              | 96                  | CGGCGATGAGGTAACGGTTA                 | TCTTACGGTGGACAGAAACC                 | This study       |
| <i>pelX</i>  | W5S_4748              | 149                 | GCCATCATGACGCAGGATAAA                | GTCCGGGTTTGCTCCAGAT                  | This study       |
| <i>narG</i>  | W5S_2539              | 155                 | ACAACAATCCGCAGTGGAAAA                | CAAGCGCAGTTTAACGTCTTCA               | This study       |
| <i>nirD</i>  | W5S_4205              | 173                 | GCAGATTTACGCCATCAGCA                 | AAGCTGCAACAGAATAGGCATCA              | This study       |
| <i>hep</i>   | W5S_0060              | 118                 | GACGAGATGCTGGTTCAGGAA                | TGTTCACTGCGACGGTGAA                  | This study       |
| <i>ffh</i>   | W5S_1021              | 100                 | AAGGTTGACCGTACACAGGCA                | TGCGCATCTGCTTAAGCTGA                 | This study       |
| <i>recA</i>  | W5S_1006              | 94                  | CGTCGTA CTGGCGCTATCAA                | GTTTGAACGGTGCTGCCA                   | This study       |

**Table S2. Mutagenization primers, mutagenization confirmation primers, and pBluescript SK– insert primers**

| <b>Primer</b>                       | <b>Sequence 5'→3'</b>                                                  | <b>Reference</b> |
|-------------------------------------|------------------------------------------------------------------------|------------------|
| Mutagenization primers              |                                                                        |                  |
| RsmA-F                              | GCGGGGAGACAGAGAGACCCGACTCTTTATAATCTTTCAAGGAGCAAAGAGTGTAGGCTGGAGCTGCTTC | This study       |
| RsmA-R                              | AGCGGGAAGTGGCAATTGCGTCCC CGAACACGAGACGCATTGTCAATCACATATGAATATCCTCCTTAG | This study       |
| REDphnF                             | TGGCCCGTCCCTTAGCGACAAGGATTGCCGATATGACTCATTCTGTTTCTGTGTAGGCTGGAGCTGCTTC | This study       |
| REDphnR                             | TTTTAGCTCCGCGATATGTGGAGCGATGAACGTTATATGTGACCCCATCCCATATGAATATCCTCCTTAG | This study       |
| Mutagenization confirmation primers |                                                                        |                  |
| C1                                  | GATCTTCCGTCACAGGTAGG                                                   | 1                |
| C2                                  | TTATACGCAAGGCGACAAGG                                                   | 1                |
| RsmACF                              | GAGTCCTGGGTTGTTGCTAAGC                                                 | This study       |
| RsmACR                              | GCTTTTGACCGCATACTCCCT                                                  | This study       |
| PhnFlankingF                        | ATGACTCTGTGGGAGGACAG                                                   | This study       |
| PhnTsekkiR                          | CAGATAGCCACAACGGGATG                                                   | This study       |
| pBluescript SK– insert primers      |                                                                        |                  |
| BSexpAF                             | AATCTAGATGAATAAATGAAGGAGGAAGATTTATTGATTAGCGTTTTTCTTGTTGATGA            | This study       |
| BSexpAR                             | AAGGATCCTCACTCACTACTTAACAATGTCTCCGC                                    | This study       |

## Reference

1. **Datsenko KA, Wanner BL.** 2000. One-step inactivation of chromosomal genes in *Escherichia coli* K-12 using PCR products. Proc. Natl. Acad. Sci. U. S. A. **97**:6640–6645.

**Table S3. *Pectobacterium wasabiae* strains used in this study**

| <b>Strain</b> | <b>Genotype</b>                                    | <b>Reference</b> |
|---------------|----------------------------------------------------|------------------|
| SCC3193       | Wild type                                          | 1                |
| SCC3060       | <i>expA::Tn10</i> , Km <sup>R</sup>                | 2                |
| RA2           | <i>rsmA::Cm<sup>R</sup></i>                        | This study       |
| DM            | SCC3060, <i>rsmA::Cm<sup>R</sup></i>               | This study       |
| EAC           | SCC3060 pBluescript <i>expA</i> + Amp <sup>R</sup> | This study       |
| EAVC          | SCC3060 pBluescript Amp <sup>R</sup>               | This study       |
| PHN           | <i>phnGHIJKLMNP::Cm<sup>R</sup></i>                | This study       |

#### **References**

- 1. Pirhonen M, Heino P, Helander I, Harju P, Palva ET.** 1988. Bacteriophage T4 resistant mutants of the plant pathogen *Erwinia carotovora*. Microb. Pathog. **4**:359–367.
- 2. Pirhonen M, Saari lahti H, Karlsson M-B, Palva ET.** 1991. Identification of pathogenicity determinants of *Erwinia carotovora* subsp. *carotovora* by transposon mutagenesis. Mol. Plant Microbe Interact. **4**:276–283.
